# Supplementary material for: Using ship-borne observations of methane isotopic ratio in the Arctic Ocean to understand methane sources in the Arctic
Source: Copernicus journal article supplement (doi:10.5194/acp-20-3987-2020), 2020-04-02
Supplement: Supplementary file 1 [file acp-20-3987-2020-supplement.pdf]

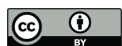

## *Supplement of*

# **Using ship-borne observations of methane isotopic ratio in the Arctic Ocean to understand methane sources in the Arctic**

**Antoine Berchet et al.**

*Correspondence to:* Antoine Berchet ([antoine.berchet@lsce.ipsl.fr](mailto:antoine.berchet@lsce.ipsl.fr))

The copyright of individual parts of the supplement might differ from the CC BY 4.0 License.

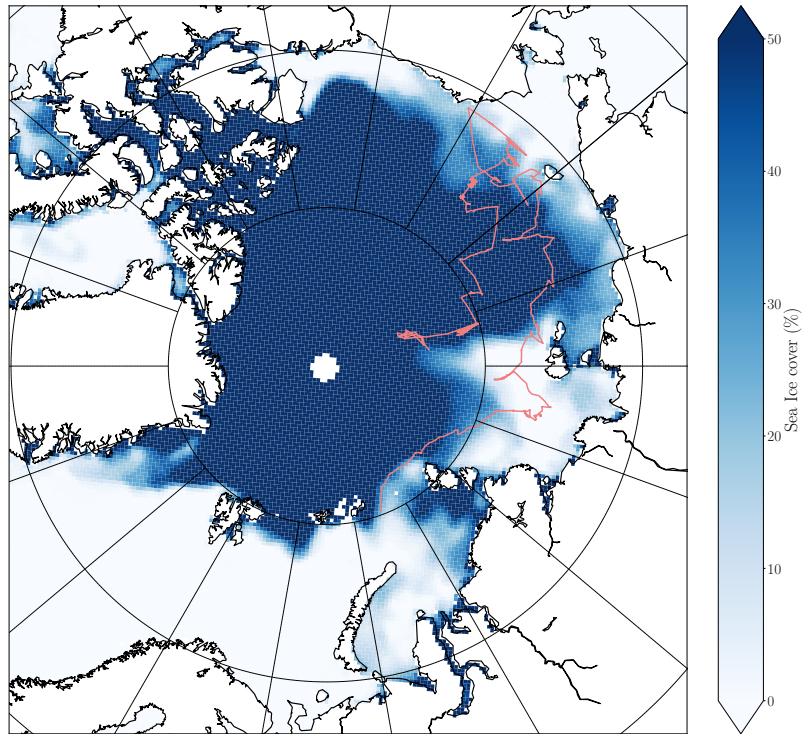

**Figure S1.** Average Sea Ice cover during summer 2014 (July–August). Data from NOAA/NSIDC passive microwave sea ice concentration climate data record (Comiso and Nishio, 2008).

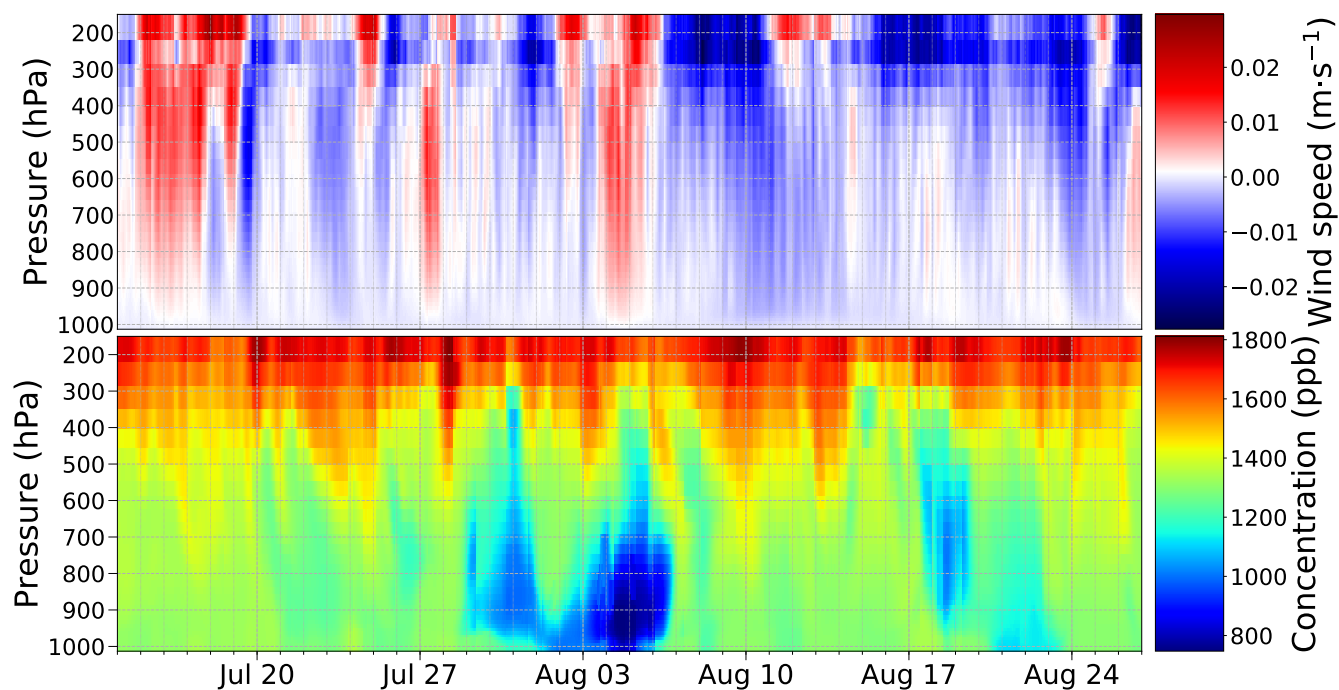

**Figure S2.** Curtains plot of vertical wind speed (top panel) and simulated concentration from the top of the domain (bottom panel)

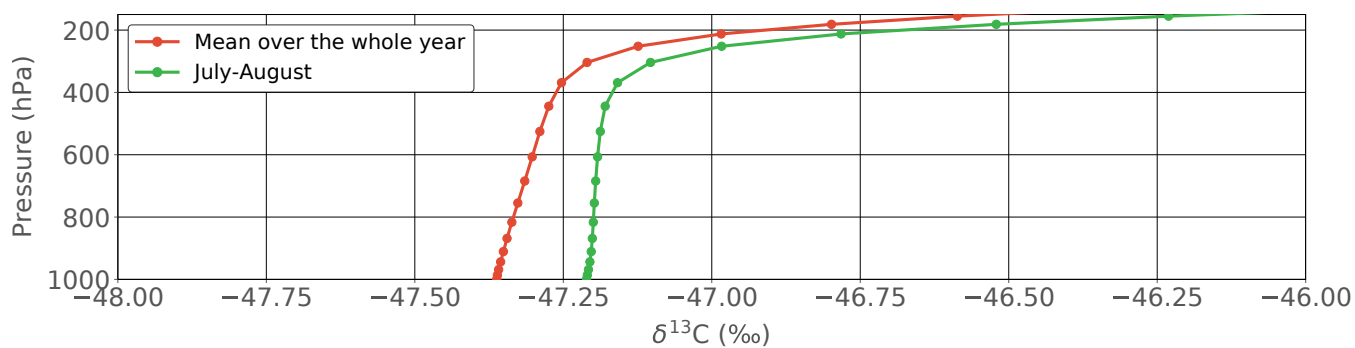

**Figure S3.** Vertical distribution of isotopic ratio as simulated by the model LMDZ averaged over the Arctic ocean for the year 2014.

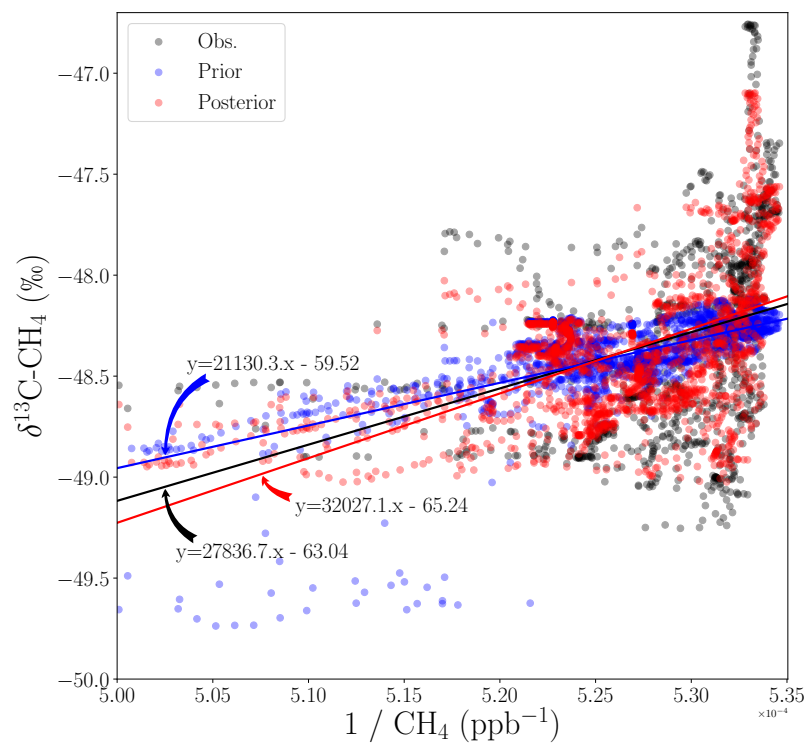

**Figure S4.** Keeling plot for the observed (black) and simulated (blue/red before/after inversion)  $\delta^{13}\text{C}-\text{CH}_4$  during the campaign.

## References

Comiso, J. C. and Nishio, F.: Trends in the sea ice cover using enhanced and compatible AMSR-E, SSM/I, and SMMR data, *Journal of Geophysical Research: Oceans*, 113, <https://doi.org/10.1029/2007JC004257>, <https://agupubs.onlinelibrary.wiley.com/doi/abs/10.1029/2007JC004257>, 2008.
